# Supplementary material for: The Copper(II)-Thiodiacetate (tda) Chelate as Efficient Receptor of N9-(2-Hydroxyethyl)Adenine (9heade): Synthesis, Molecular and Crystal Structures, Physical Properties and DFT Calculations of [Cu(tda)(9heade)(H2O)]·2H2O
Source: MDPI journal article supplement (doi:10.3390/molecules28155830), 2023-08-02

# Supplementary Material for

Article

## The Copper(II)-Thiodiacetate (tda) Chelate as Efficient Receptor of N9-(2-Hydroxyethyl)Adenine (9heade): Synthesis, Molecular and Crystal Structures, Physical Properties and DFT Calculations of $[\text{Cu}(\text{tda})(9\text{heade})(\text{H}_2\text{O})]\cdot 2\text{H}_2\text{O}$

Carmen Rosales-Martínez <sup>1</sup>, Antonio Matilla-Hernández <sup>1</sup>, Duane Choquesillo-Lazarte <sup>2</sup>, Antonio Frontera <sup>3</sup>, Alfonso Castiñeiras <sup>4</sup> and Juan Niclós-Gutiérrez <sup>1,\*</sup>

<sup>1</sup> Department of Inorganic Chemistry, Faculty of Pharmacy, University of Granada, 18071 Granada, Spain; carmenromar@correo.ugr.es (C.R.-M.); amatilla@ugr.es (A.M.-H.)

<sup>2</sup> Laboratorio de Estudios Cristalográficos, IACT, CSIC-Universidad de Granada, Avda. de las Palmeras 4, 18100 Armilla-Granada, Spain; duane.choquesillo@csic.es

<sup>3</sup> Departament de Química, Universitat de les Illes Balears, Crta. de Valldemossa km 7.5, 07122 Palma de Mallorca, Spain; toni.frontera@uib.es

<sup>4</sup> Department of Inorganic Chemistry, Faculty of Pharmacy, University of Santiago de Compostela, 15782 Santiago de Compostela, Spain; alfonso.castineiras@usc.es

\* Correspondence: jniclos@ugr.es

**Table S1.** Selected bond lengths [Å] and angles [°] for  $[\text{Cu}(\text{tda})(9\text{heade})(\text{H}_2\text{O})]\cdot 2\text{H}_2\text{O}$ .

**Table S2.** Hydrogen bonds for  $[\text{Cu}(\text{tda})(9\text{heade})(\text{H}_2\text{O})]\cdot 2\text{H}_2\text{O}$  [Å and °]

**Figures S1.** FT-IR spectra

**Figure S2.** Electronic spectrum (diffuse reflectance)

**Figure S3.** TGA analysis

**Figure S4.** Comparison powder X-ray diffraction patterns

**Figure S5.** ESR spectra.

Table S1. Selected bond lengths [Å] and angles [°] for  
[Cu(tda)(9heade)(H<sub>2</sub>O)] · 2H<sub>2</sub>O.

|                               |            |
|-------------------------------|------------|
| Cu(1)–O(4)                    | 1.933(2)   |
| Cu(1)–O(1)                    | 1.962(2)   |
| Cu(1)–N(21)                   | 2.025(2)   |
| Cu(1)–O(8)                    | 2.262(2)   |
| Cu(1)–S(1)                    | 2.3625(8)  |
| Cu(1)–O(2) <sup>a</sup>       | 3.060(4)   |
| O(4)–Cu(1)–O(1)               | 175.04(10) |
| O(4)–Cu(1)–N(21)              | 96.16(9)   |
| O(1)–Cu(1)–N(21)              | 87.56(9)   |
| O(4)–Cu(1)–O(8)               | 86.36(10)  |
| O(1)–Cu(1)–O(8)               | 96.03(9)   |
| N(21)–Cu(1)–O(8)              | 102.95(9)  |
| O(4)–Cu(1)–S(1)               | 87.22(7)   |
| O(1)–Cu(1)–S(1)               | 88.77(7)   |
| N(21)–Cu(1)–S(1)              | 173.58(7)  |
| O(8)–Cu(1)–S(1)               | 82.67(5)   |
| O(4)–Cu(1)–O(2) <sup>a</sup>  | 70.77(10)  |
| O(1)–Cu(1)–O(2) <sup>a</sup>  | 105.90(9)  |
| N(21)–Cu(1)–O(2) <sup>a</sup> | 92.04(9)   |
| O(8)–Cu(1)–O(2) <sup>a</sup>  | 153.95(8)  |
| S(1)–Cu(1)–O(2) <sup>a</sup>  | 83.90(6)   |

---

Symmetry transformations used to generate equivalent atoms:

a = x-1, y, z.

**Table S2. Hydrogen bonds for [Cu(tda)(9heade)(H<sub>2</sub>O)] · 2H<sub>2</sub>O [Å and °].**

| D-H ··· A                                  | d(D-H) | d(H ··· A) | d(D ··· A) | ∠(DHA) |
|--------------------------------------------|--------|------------|------------|--------|
| O(1) –<br>H(1B) . . . O(8) <sup>a</sup>    | 0.85   | 1.86       | 2.699 (3)  | 168.2  |
| O(1) –<br>H(1A) . . . O(9) <sup>b</sup>    | 0.85   | 1.79       | 2.662 (3)  | 163.7  |
| O(2) –<br>H(2C) . . . O(4)                 | 0.85   | 2.50       | 3.108 (4)  | 129.7  |
| O(2) –<br>H(2C) . . . O(5)                 | 0.85   | 1.86       | 2.691 (4)  | 164.7  |
| O(2) –<br>H(2D) . . . O(5) <sup>c</sup>    | 0.85   | 1.98       | 2.816 (3)  | 167.8  |
| O(3) –<br>H(3A) . . . O(9) <sup>b</sup>    | 0.85   | 1.98       | 2.819 (3)  | 169.9  |
| O(3) –<br>H(3B) . . . N(23) <sup>a</sup>   | 0.85   | 2.11       | 2.918 (4)  | 157.7  |
| O(32) –<br>H(32) . . . O(3)                | 0.82   | 1.93       | 2.744 (3)  | 170.8  |
| N(26) –<br>H(26A) . . . O(2) <sup>a</sup>  | 0.86   | 1.96       | 2.757 (4)  | 154.0  |
| N(26) –<br>H(26B) . . . N(27) <sup>d</sup> | 0.86   | 2.18       | 2.980 (4)  | 154.1  |
| C(2) –<br>H(2A) . . . O(32) <sup>e</sup>   | 0.97   | 2.35       | 3.297 (4)  | 165.2  |
| C(6) –<br>H(6B) . . . O(32) <sup>e</sup>   | 0.97   | 2.53       | 3.443 (4)  | 156.4  |
| C(22) –<br>H(22) . . . O(1) <sup>f</sup>   | 0.93   | 2.52       | 3.412 (4)  | 161.2  |
| C(22) –<br>H(22) . . . O(8)                | 0.93   | 2.61       | 3.282 (4)  | 129.6  |

Symmetry transformations used to generate equivalent atoms:

a = x-1, y, z; b = -x+1, -y+1, -z+1; c = -x+2, -y+1, -z+2; d = -x, -y, -z+2; e = x, y+1, z; f = x+1, y, z

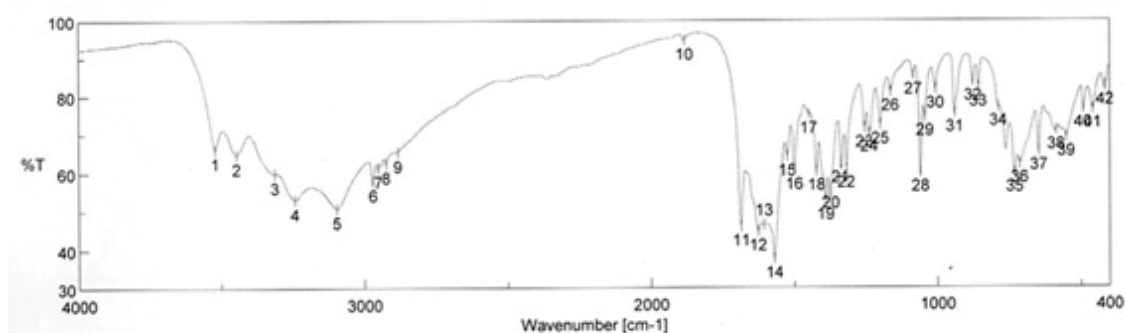

[ Result of Peak Picking ]

| No. | Position | Intensity | No. | Position | Intensity | No. | Position | Intensity |
|-----|----------|-----------|-----|----------|-----------|-----|----------|-----------|
| 1   | 3521.38  | 66.0202   | 2   | 3446.17  | 64.6513   | 3   | 3313.11  | 59.7551   |
| 4   | 3242.72  | 52.928    | 5   | 3097.12  | 50.7111   | 6   | 2969.84  | 57.806    |
| 7   | 2951.52  | 61.3051   | 8   | 2924.52  | 62.3599   | 9   | 2884.02  | 65.2647   |
| 10  | 1883.15  | 94.5863   | 11  | 1686.44  | 45.9874   | 12  | 1627.63  | 44.7063   |
| 13  | 1606.41  | 46.3469   | 14  | 1570.74  | 37.5623   | 15  | 1525.42  | 64.0976   |
| 16  | 1500.35  | 60.5881   | 17  | 1450.21  | 75.1749   | 18  | 1423.21  | 60.349    |
| 19  | 1391.39  | 52.7427   | 20  | 1373.07  | 55.6248   | 21  | 1339.32  | 62.3386   |
| 22  | 1319.07  | 61.0095   | 23  | 1255.43  | 71.5281   | 24  | 1239.04  | 70.3587   |
| 25  | 1200.47  | 72.415    | 26  | 1164.79  | 81.0214   | 27  | 1084.76  | 85.3574   |
| 28  | 1059.69  | 59.9967   | 29  | 1044.26  | 74.4588   | 30  | 1007.62  | 81.7111   |
| 31  | 940.128  | 75.4933   | 32  | 876.488  | 83.6893   | 33  | 858.168  | 82.1281   |
| 34  | 787.779  | 77.0193   | 35  | 730.889  | 59.7875   | 36  | 713.533  | 62.1769   |
| 37  | 647.001  | 65.4159   | 38  | 586.254  | 70.798    | 39  | 551.542  | 69.0303   |
| 40  | 492.723  | 76.5139   | 41  | 458.975  | 76.4116   | 42  | 415.585  | 82.4419   |

(a)

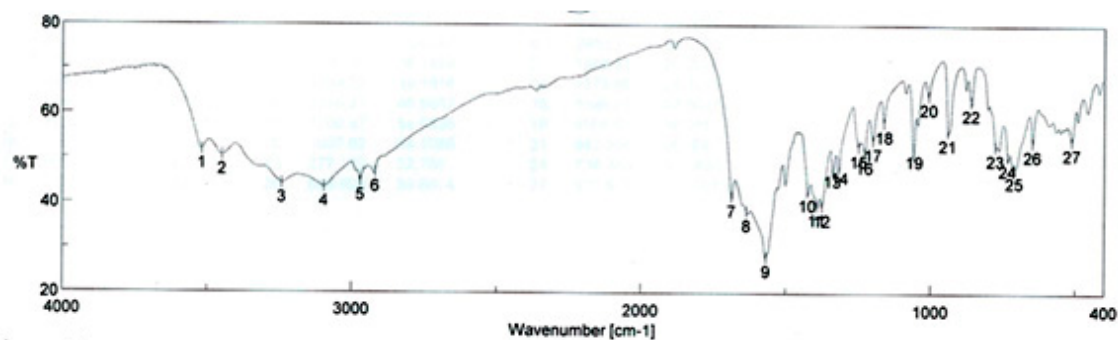

(b)

Figure S1a. Minimally ground sample of compound 1.b.Ground sample of compound 1.

Figure S2. Electronic spetrun (diffuse reflectance)

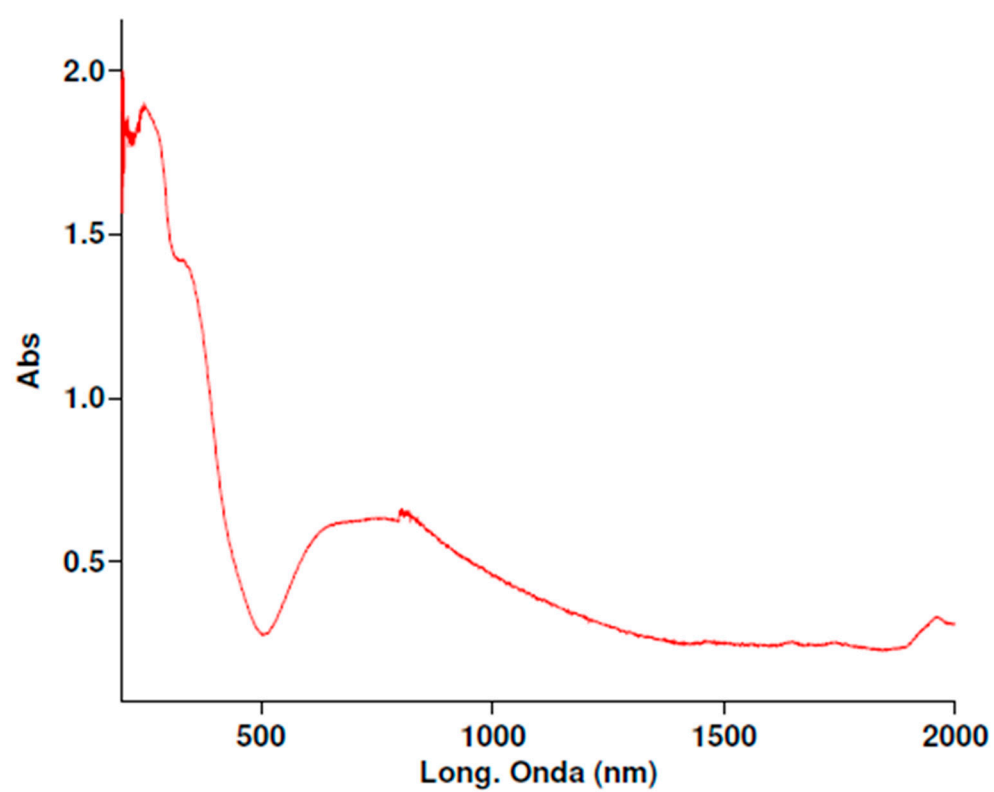

**Figure S3.** TGA analysis. Three FT-IR spectra of the evolved gases during the TGA of compound 1.

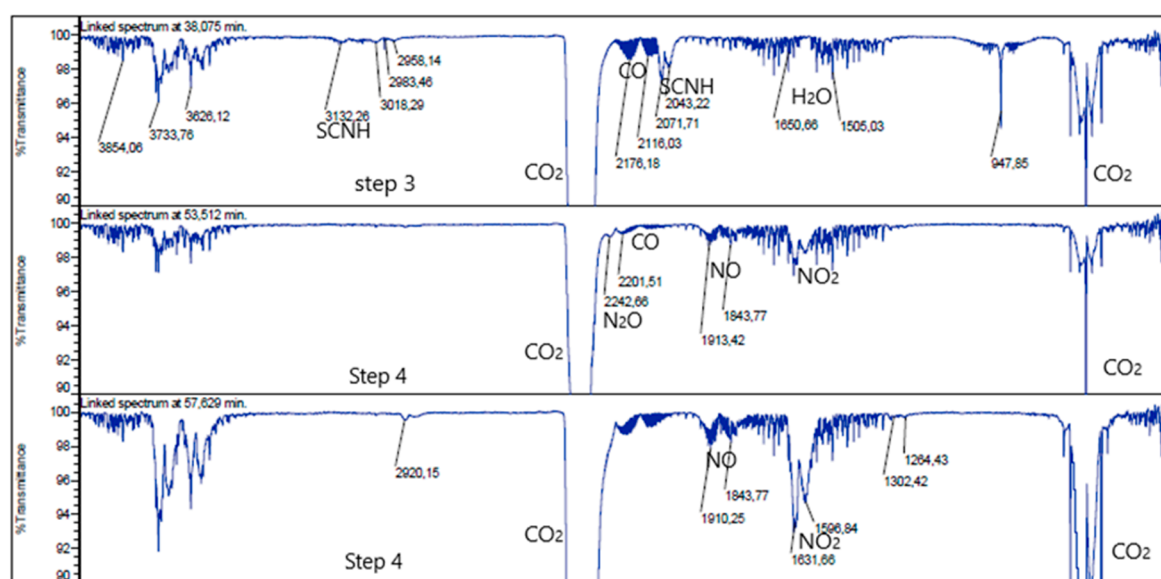

Figure S4. Comparison between experimental (blue) (collected using Phillips and room temperature) and calculated powder X-ray diffraction patterns for the complex 1. The two diffractograms are similar, confirming that the bulk crystalline sample consists of a single phase.

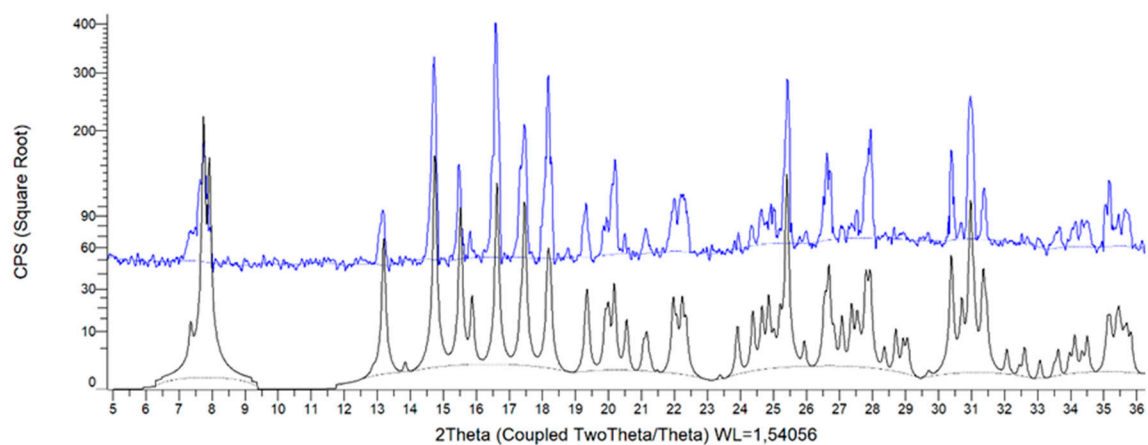

Figure S5. ESR spectra.

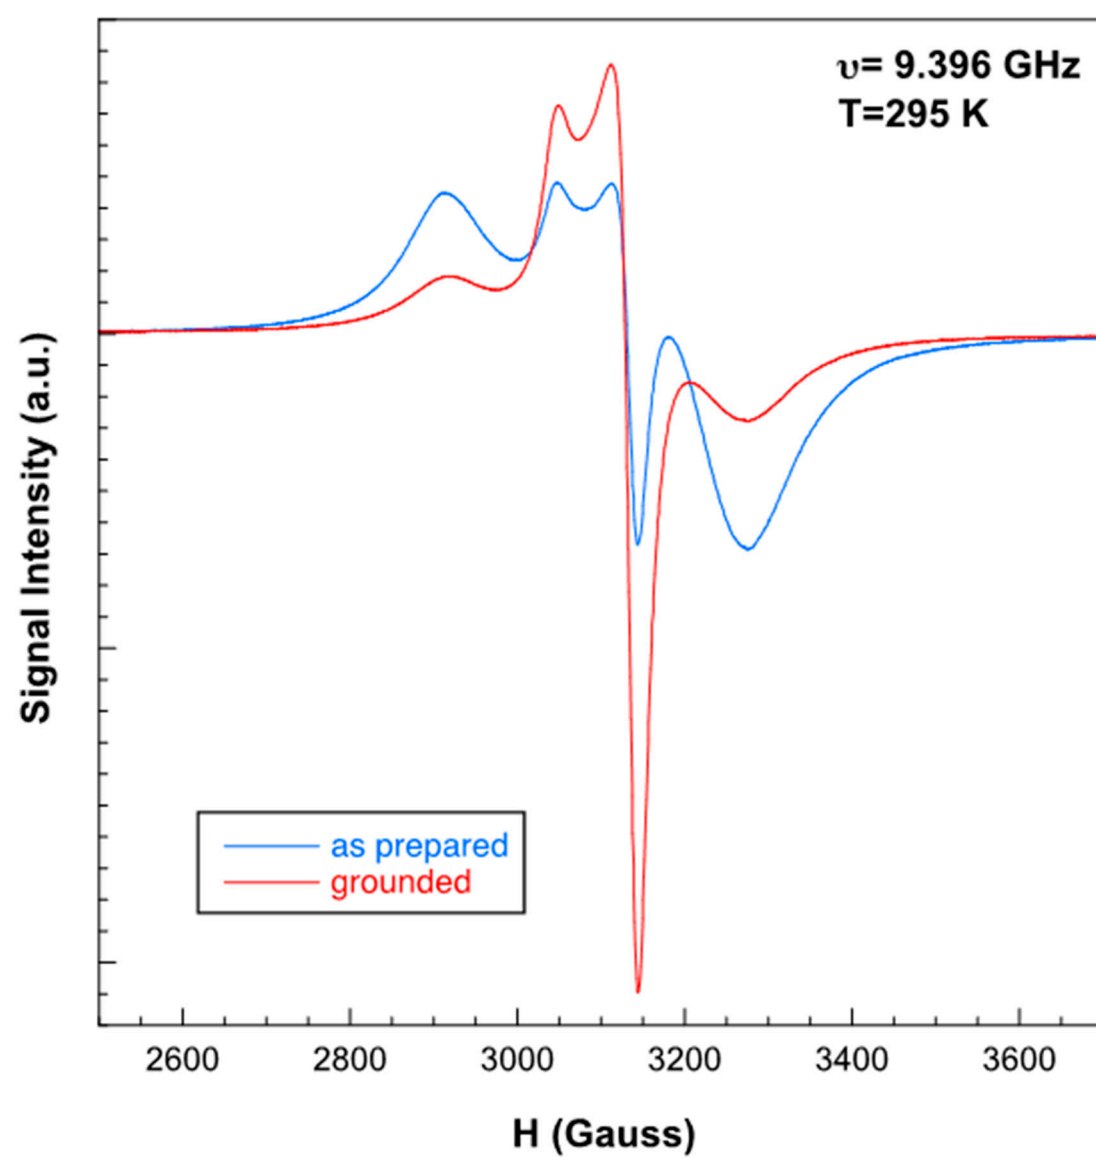

Supplement: s1 [file s1]
